# Supplementary material for: SARS-CoV-2 and Immunity: Natural Infection Compared with Vaccination
Source: MDPI journal article supplement (doi:10.3390/ijms23168982), 2022-08-11
Supplement: s1 [file s1]

## Supplementary Information

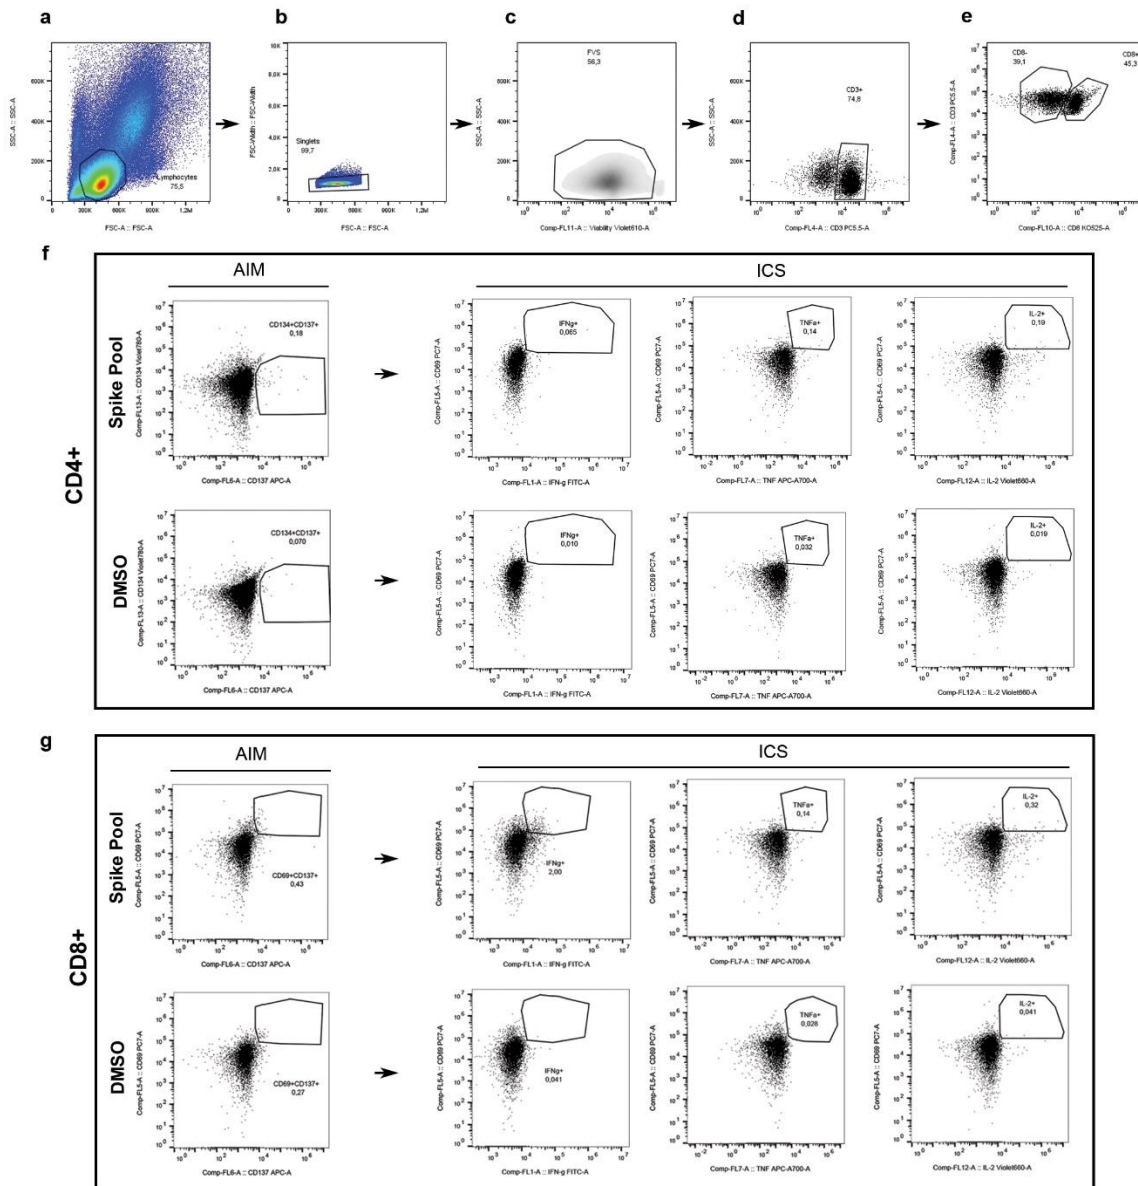

**Figure S1. Gating strategy of SARS-CoV-2 spike-specific T lymphocytes.** As a first step, lymphocytes were selected in a forward scatter (FSC-A)/side scatter (SSC-A) dot-plot (**a**). Then, aggregates were excluded (FSC-A/FSC-W dot-plot, **b**) and live cells were identified (FVS- events, **c**). Next, CD3+ T-cells were gated in a CD3/SSC-A dot-plot (**d**). Among T cells, CD8- (further identified as CD4+ cells) and CD8+ subsets were gated (**e**). TCR-dependent activation induced markers (AIM) and intracellular cytokine staining assays (ICS) were evaluated for both CD4+ and CD8+ T cells (**f**, **g**, respectively), using the corresponding dimethyl sulfoxide (DMSO) control to assess and subtract the background.

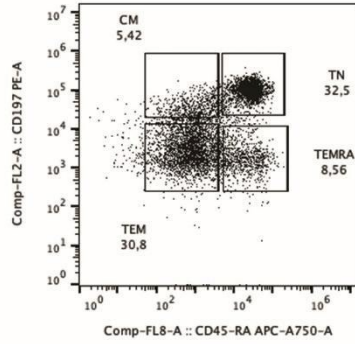

**Figure S2. Phenotypic analysis of CD8+ T cells.** Within the CD8+ T cell population (selected as shown in Figure S1 (A-E), T effector memory (TEM, CD197-/CD45RA-), T effector memory RA (TEMRA, CD197-/CD45RA+), T naïve (TN, CD197+/CD45RA+), and central memory compartments (CM, CD197+/CD45RA-) were gated.

| Supplementary Table S1 |      |                   |              |
|------------------------|------|-------------------|--------------|
| Cohort                 | n    | Age (years)       | Age (median) |
| CTRL                   | 19   | 44.94 $\pm$ 11.43 | 44           |
| NI                     | 16   | 58.5 $\pm$ 12.85  | 62.5         |
| ChAdOx1                | 22   | 46.76 $\pm$ 11.25 | 45           |
| Ad26.COV2.S            | 7    | 46.28 $\pm$ 10.72 | 51           |
| BNT162b2               | 52   | 48.15 $\pm$ 15.74 | 47.5         |
| mRNA-1273              | 9    | 50.00 $\pm$ 12.67 | 53           |
|                        |      |                   |              |
| Gender                 | %    | Age (years)       | Age (median) |
| Male                   | 50.4 | 50.11 $\pm$ 14.71 | 50           |
| Female                 | 49.6 | 47.51 $\pm$ 13.15 | 45           |

**Table S1. Demographic characteristics of the study participants.** Displayed data represent mean  $\pm$  standard deviation and the median age of subjects enrolled in the study from each vaccine platform.

| Supplementary Table S2 |              |                     |                        |                     |                |
|------------------------|--------------|---------------------|------------------------|---------------------|----------------|
| SURFACE                |              |                     |                        |                     |                |
| <i>Antigen</i>         | <i>Clone</i> | <i>Fluorochrome</i> | <i>Amount per test</i> | <i>Manufacturer</i> | <i>Cat. No</i> |
| CD197                  | 2-L1-A       | PE                  | 5 µl                   | BD Biosciences      | 566742         |
| CD3                    | SK7          | PerCP-Cy5.5         | 20 µl                  | BD Biosciences      | 332771         |
| CD69                   | FN50         | PE-Cy7              | 5 µl                   | BD Biosciences      | 561928         |
| CD45RA                 | HI100        | APC-H7              | 5 µl                   | BD Biosciences      | 560674         |
| CD8                    | SK1          | V500-C              | 5 µl                   | BD Biosciences      | 647457         |
| FVS 575V               | NA           | NA                  | 1 µl                   | BD Biosciences      | 565694         |
| INTRACELLULAR          |              |                     |                        |                     |                |
| <i>Antigen</i>         | <i>Clone</i> | <i>Fluorochrome</i> | <i>Amount per test</i> | <i>Manufacturer</i> | <i>Cat. No</i> |
| CD134                  | L106         | BV768               | 5 µl                   | BD Biosciences      | 744746         |
| CD137                  | 4B4-1        | APC                 | 20 µl                  | BD Biosciences      | 550890         |
| IFN-γ                  | B27          | FITC                | 20 µl                  | BD Biosciences      | 552887         |
| TNF-α                  | MAb11        | Alexa Fluor™700     | 5 µl                   | BD Biosciences      | 557996         |
| IL-2                   | 5344.111     | BV711               | 5 µl                   | BD Biosciences      | 563946         |

**Table S2. Flow cytometry reagents.** In the list are shown the antibodies utilized in the study for surface and intracellular staining. NA = not applicable.
